# Supplementary material for: LncRNA CARLo-7 facilitates proliferation, migration, invasion, and EMT of bladder cancer cells by regulating Wnt/β-catenin and JAK2/STAT3 signaling pathways
Source: PubMed Central journal article supplement — Transl Androl Urol. 2020 Oct;9(5):2251–61. doi: 10.21037/tau-20-1293 (PMC7658127; doi:10.21037/tau-20-1293), 2020-10
Supplement: tau-09-05-2251-rc.pdf [file tau-09-05-2251-rc.pdf]

## **Materials Design Analysis Reporting (MDAR) Checklist for Authors**

The MDAR framework establishes a minimum set of requirements in transparent reporting applicable to studies in the life sciences (see Statement of Task: [doi:10.31222/osf.io/9sm4x](https://doi.org/10.31222/osf.io/9sm4x)). The MDAR checklist is a tool for authors, editors and others seeking to adopt the MDAR framework for transparent reporting in manuscripts and other outputs. Please refer to the MDAR Elaboration Document for additional context for the MDAR framework.

**Materials**

|                                                                                                                                                                                                         |                                                                                                                                                                                                                                                                                                                                                                                                                                                                                                                             |            |
|---------------------------------------------------------------------------------------------------------------------------------------------------------------------------------------------------------|-----------------------------------------------------------------------------------------------------------------------------------------------------------------------------------------------------------------------------------------------------------------------------------------------------------------------------------------------------------------------------------------------------------------------------------------------------------------------------------------------------------------------------|------------|
| <b>Antibodies</b>                                                                                                                                                                                       | <b>Yes (indicate where provided: section/paragraph)</b>                                                                                                                                                                                                                                                                                                                                                                                                                                                                     | <b>n/a</b> |
| For commercial reagents, provide supplier name, catalogue number and RRID, if available.                                                                                                                | Primary antibodies purchased from Abcam (Cambridge, UK) included anti-E-cadherin (ab182733, 1:1,000), anti-N-cadherin (ab13847, 1:500), anti-Vimentin (ab44976, 1:2,000), anti-JAK2 (ab108596, 1:5,000), anti-p-JAK2 (ab32101, 1:5,000), anti-STAT3 (ab31369, 1:1,000), anti-p-STAT3 (ab30645, 1:1,000), anti- $\beta$ -catenin (ab6302, 1:4,000) and anti- $\beta$ -actin (ab8245, 1:1,000). Secondary antibodies included goat anti-mouse IgG (ab6789, 1:5,000; Abcam) and goat anti-rabbit IgG (ab6721, 1:5,000; Abcam). |            |
| <b>Cell materials</b>                                                                                                                                                                                   | <b>Yes (indicate where provided: section/paragraph)</b>                                                                                                                                                                                                                                                                                                                                                                                                                                                                     | <b>n/a</b> |
| <b>Cell lines:</b> Provide species information, strain. Provide accession number in repository <b>OR</b> supplier name, catalog number, clone number, <b>OR</b> RRID                                    | Human BC cell lines T24 and HT1197, and human epithelial SV40 immortalized uroepithelium cell line SV-HUC-1 were all obtained from the Stem Cell Bank, Chinese Academy of Sciences, Shanghai, China.                                                                                                                                                                                                                                                                                                                        |            |
| <b>Primary cultures:</b> Provide species, strain, sex of origin, genetic modification status.                                                                                                           |                                                                                                                                                                                                                                                                                                                                                                                                                                                                                                                             | N/A        |
| <b>Experimental animals</b>                                                                                                                                                                             | <b>Yes (indicate where provided: section/paragraph)</b>                                                                                                                                                                                                                                                                                                                                                                                                                                                                     | <b>n/a</b> |
| <b>Laboratory animals:</b> Provide species, strain, sex, age, genetic modification status. Provide accession number in repository <b>OR</b> supplier name, catalog number, clone number, <b>OR</b> RRID |                                                                                                                                                                                                                                                                                                                                                                                                                                                                                                                             | N/A        |
| <b>Animal observed in or captured from the field:</b> Provide species, sex and age where possible                                                                                                       |                                                                                                                                                                                                                                                                                                                                                                                                                                                                                                                             | N/A        |
| <b>Model organisms:</b> Provide Accession number in repository (where relevant) <b>OR</b> RRID                                                                                                          |                                                                                                                                                                                                                                                                                                                                                                                                                                                                                                                             | N/A        |
| <b>Plants and microbes</b>                                                                                                                                                                              | <b>Yes (indicate where provided: section/paragraph)</b>                                                                                                                                                                                                                                                                                                                                                                                                                                                                     | <b>n/a</b> |
| <b>Plants:</b> provide species and strain, unique accession number if available, and source (including location for collected wild specimens)                                                           |                                                                                                                                                                                                                                                                                                                                                                                                                                                                                                                             | N/A        |
| <b>Microbes:</b> provide species and strain, unique accession number if available, and source                                                                                                           |                                                                                                                                                                                                                                                                                                                                                                                                                                                                                                                             | N/A        |
| <b>Human research participants</b>                                                                                                                                                                      | <b>Yes (indicate where provided: section/paragraph)</b>                                                                                                                                                                                                                                                                                                                                                                                                                                                                     | <b>n/a</b> |
| Identify authority granting ethics approval (IRB or equivalent committee(s), provide reference number for approval.                                                                                     | All procedures performed in this study involving human participants were in accordance with the Declaration of Helsinki (as revised in 2013). A total of 143 BC samples and paired adjacent normal tissues were collected from Peking Union Medical College Hospital between March 2015 and April 2018. The Ethics Committee approved this study of Qianfoshan Hospital Affiliated to Shandong University, SYXK (Jing) 2017-0015.                                                                                           |            |
| Provide statement confirming informed consent obtained from study participants.                                                                                                                         | Written informed consent was obtained from all patients enrolled in this study.                                                                                                                                                                                                                                                                                                                                                                                                                                             |            |
| Report on age and sex for all study participants.                                                                                                                                                       | This was reported in Table 1.                                                                                                                                                                                                                                                                                                                                                                                                                                                                                               |            |

**Design**

|                                                                                                                                                                     |                                                                                                                                                                                                                                                                  |            |
|---------------------------------------------------------------------------------------------------------------------------------------------------------------------|------------------------------------------------------------------------------------------------------------------------------------------------------------------------------------------------------------------------------------------------------------------|------------|
| <b>Study protocol</b>                                                                                                                                               | <b>Yes (indicate where provided: section/paragraph)</b>                                                                                                                                                                                                          | <b>n/a</b> |
| For clinical trials, provide the trial registration number <b>OR</b> cite DOI in manuscript.                                                                        |                                                                                                                                                                                                                                                                  | N/A        |
| <b>Laboratory protocol</b>                                                                                                                                          | <b>Yes (indicate where provided: section/paragraph)</b>                                                                                                                                                                                                          | <b>n/a</b> |
| Provide DOI or other citation details if detailed step-by-step protocols are available.                                                                             |                                                                                                                                                                                                                                                                  | N/A        |
| <b>Experimental study design (statistics details)</b>                                                                                                               | <b>Yes (indicate where provided: section/paragraph)</b>                                                                                                                                                                                                          | <b>n/a</b> |
| State whether and how the following have been done, <b>or</b> if they were not carried out.                                                                         |                                                                                                                                                                                                                                                                  |            |
| Sample size determination                                                                                                                                           | We collected as more samples as we can.                                                                                                                                                                                                                          |            |
| Randomisation                                                                                                                                                       |                                                                                                                                                                                                                                                                  | N/A        |
| Blinding                                                                                                                                                            |                                                                                                                                                                                                                                                                  | N/A        |
| Inclusion/exclusion criteria                                                                                                                                        | The inclusion criteria was defined as certain diagnosis of bladder cancer. Also, patients who had received any treatment such as chemotherapy, radiotherapy, and biological medication (monoclonal antibodies) before the sampling were excluded from the study. |            |
| <b>Sample definition and in-laboratory replication</b>                                                                                                              | <b>Yes (indicate where provided: section/paragraph)</b>                                                                                                                                                                                                          | <b>n/a</b> |
| State number of times the experiment was replicated in laboratory                                                                                                   | In triplicates or more.                                                                                                                                                                                                                                          |            |
| Define whether data describe technical or biological replicates                                                                                                     | Technical replicates.                                                                                                                                                                                                                                            |            |
| <b>Ethics</b>                                                                                                                                                       | <b>Yes (indicate where provided: section/paragraph)</b>                                                                                                                                                                                                          | <b>n/a</b> |
| Studies involving human participants: State details of authority granting ethics approval (IRB or equivalent committee(s), provide reference number for approval.   | The Ethics Committee approved this study of Qianfoshan Hospital Affiliated to Shandong University, SYXK (Jing) 2017-0015.                                                                                                                                        |            |
| Studies involving experimental animals: State details of authority granting ethics approval (IRB or equivalent committee(s), provide reference number for approval. |                                                                                                                                                                                                                                                                  | N/A        |
| Studies involving specimen and field samples: State if relevant permits obtained, provide details of authority approving study; if none were required, explain why. |                                                                                                                                                                                                                                                                  | N/A        |
| <b>Dual Use Research of Concern (DURC)</b>                                                                                                                          | <b>Yes (indicate where provided: section/paragraph)</b>                                                                                                                                                                                                          | <b>n/a</b> |
| If study is subject to dual use research of concern, state the authority granting approval and reference number for the regulatory approval                         |                                                                                                                                                                                                                                                                  | N/A        |

**Analysis**

|                                                                                                                                               |                                                                                                                                                                                                                                                                                                                                                                                                 |            |
|-----------------------------------------------------------------------------------------------------------------------------------------------|-------------------------------------------------------------------------------------------------------------------------------------------------------------------------------------------------------------------------------------------------------------------------------------------------------------------------------------------------------------------------------------------------|------------|
| <b>Attrition</b>                                                                                                                              | <b>Yes (indicate where provided: section/paragraph)</b>                                                                                                                                                                                                                                                                                                                                         | <b>n/a</b> |
| State if sample or data point from the analysis is excluded, and whether the criteria for exclusion were determined and specified in advance. |                                                                                                                                                                                                                                                                                                                                                                                                 | N/A        |
| <b>Statistics</b>                                                                                                                             | <b>Yes (indicate where provided: section/paragraph)</b>                                                                                                                                                                                                                                                                                                                                         | <b>n/a</b> |
| Describe statistical tests used and justify choice of tests.                                                                                  | Data were analyzed by GraphPad Prism 8.0 software (GraphPad Inc., USA). The difference between the two groups was analyzed by paired sample t-test. The difference between multiple groups was analyzed by one-way analysis. All data were shown as mean $\pm$ standard deviation ( $\bar{x} \pm s.d$ ) with at least three replicates. $P \leq 0.05$ was considered statistically significant. |            |
| <b>Data Availability</b>                                                                                                                      | <b>Yes (indicate where provided: section/paragraph)</b>                                                                                                                                                                                                                                                                                                                                         | <b>n/a</b> |
| State whether newly created datasets are available, including protocols for access or restriction on access.                                  |                                                                                                                                                                                                                                                                                                                                                                                                 | N/A        |
| If data are publicly available, provide accession number in repository or DOI or URL.                                                         |                                                                                                                                                                                                                                                                                                                                                                                                 | N/A        |
| If publicly available data are reused, provide accession number in repository or DOI or URL, where possible.                                  |                                                                                                                                                                                                                                                                                                                                                                                                 | N/A        |
| <b>Code Availability</b>                                                                                                                      | <b>Yes (indicate where provided: section/paragraph)</b>                                                                                                                                                                                                                                                                                                                                         | <b>n/a</b> |
| For all newly generated code and software essential for replicating the main findings of the study:                                           |                                                                                                                                                                                                                                                                                                                                                                                                 | N/A        |
| State whether the code or software is available.                                                                                              |                                                                                                                                                                                                                                                                                                                                                                                                 | N/A        |
| If code is publicly available, provide accession number in repository, or DOI or URL.                                                         |                                                                                                                                                                                                                                                                                                                                                                                                 | N/A        |

**Reporting**

|                                                                                                                                                                                                                                          |                                                                                               |            |
|------------------------------------------------------------------------------------------------------------------------------------------------------------------------------------------------------------------------------------------|-----------------------------------------------------------------------------------------------|------------|
| <b>Adherence to community standards</b>                                                                                                                                                                                                  | <b>Yes (indicate where provided: section/paragraph)</b>                                       | <b>n/a</b> |
| MDAR framework recommends adoption of discipline-specific guidelines, established and endorsed through community initiatives. Journals have their own policy about requiring specific guidelines and recommendations to complement MDAR. |                                                                                               |            |
| State if relevant guidelines (eg., ICMJE, MIBBI, ARRIVE) have been followed, and whether a checklist (eg., CONSORT, PRISMA, ARRIVE) is provided with the manuscript.                                                                     | ICMJE guidelines were followed, as the journal follows ICMJE recommendations for publication. |            |

**Article Information:** <http://dx.doi.org/10.21037/tau-20-1293>
